# Supplementary material for: Waveform detection by deep learning reveals multi-area spindles that are selectively modulated by memory load
Source: eLife. 2022 Jun 29;11:e75769. doi: 10.7554/eLife.75769 (PMC9242645; doi:10.7554/eLife.75769)
Supplement: Supplementary file 1. — Examples of CNN and AT implementation using surrogate data with systematically varying noise properties. The CNN models were able to detect the majority of spindles (sensitivity above 97%) subject to different types of noise as opposed to the AT which achieved lower performance (specificity around 72–87%). The CNN model was trained over a subset of high-quality spindles (about 36–41%) detected by the signal-to-noise ratio (SNR) approach using the 99th percentile threshold of the SNR distribution. The high sensitivity and specificity verifies the superior performance of CNN to detect the specific waveform characteristics distinguishing the sleep spindle rhythm in the recordings with significantly varying types of noise. [file elife-75769-supp1.xlsx]

## Sheet: Sheet1
Noise	Sensitivity			Specificity
	CNN	AT	Training set (SNR)	CNN	AT	Training set (SNR)
White Noise with Constant Power Spectrum	1	0.87	0.36	0.99	1	1
Noise with 1/f Power Spectrum	1	0.86	0.36	0.99	1	1
Pink Noise with 1/f Power Spectrum	0.98	0.84	0.36	0.99	1	1
Brownian Noise with 1/f2 Power Spectrum	1	0.85	0.36	0.99	1	1
Theta Oscillation	0.97	0.87	0.41	1	1	1
Noise Artifacts - 2 artifacts/min	1	0.72	0.39	1	1	1
