# Supplementary material for: Waveform detection by deep learning reveals multi-area spindles that are selectively modulated by memory load
Source: eLife. 2022 Jun 29;11:e75769. doi: 10.7554/eLife.75769 (PMC9242645; doi:10.7554/eLife.75769)
Supplement: Supplementary file 2. [file elife-75769-supp2.xlsx]

## Sheet: Sheet1
Brain Region	Subject A	Subject B	Subject C	Subject D	Subject E
Amygdala	0	5	4	4	0
Caudal Middle Frontal	0	0	0	0	3
Entorhinal	0	1	0	0	0
Fusiform	0	1	0	3	0
Hippocampus	8	12	8	6	0
Insula	1	27	17	1	9
Lateral Orbitofrontal	0	3	2	0	6
Medial Orbitofrontal	1	1	1	0	2
Middle Temporal	3	4	8	9	0
Pars Opercularis	0	0	1	0	0
Pars Orbitalis	0	1	0	0	0
Pars Triangularis	1	1	2	0	4
Rostral Anterior Cingulate	1	2	1	0	4
Rostral Middle Frontal	7	2	6	0	9
Superior Frontal	1	0	4	0	17
Superior Temporal	4	0	0	2	0
Transverse Temporal	0	0	0	1	0
