# Supplementary material for: Waveform detection by deep learning reveals multi-area spindles that are selectively modulated by memory load
Source: eLife. 2022 Jun 29;11:e75769. doi: 10.7554/eLife.75769 (PMC9242645; doi:10.7554/eLife.75769)
Supplement: Supplementary file 3. — Values reported are the average Cronbach’s alpha computed over different combinations of CNN hyperparameters which measure the similarity of the outputs (the average alpha computed over the randomly shuffled outputs are approximately 0.005 for each combination). Parameter values in bold are used in the current version of the CNN model. [file elife-75769-supp3.xlsx]

## Sheet: Sheet1
CNN hyperparameters	Values	4 Conv. layers	5 Conv. layers	6 Conv. layers	Overall
Pool size	[10, 14, 15, 16, 20]	0.96	0.97	0.97	0.99
Learning rate	[0.0005,0.0009, 0.001, 0.0011, 0.0015]	0.97	0.98	0.98	0.99
Maximum number of epochs	[2,3,4,5,6]	0.97	0.98	0.98	0.99
